# Supplementary material
Source: publisher figshare collection journal article supplement (https://frontiersin.figshare.com/ndownloader/files/21031086)
Supplement: Supplementary file [file 21031086]

# **Cross-cancer pleiotropic analysis reveals novel susceptibility loci for lung cancer**

**Supplementary Figures**

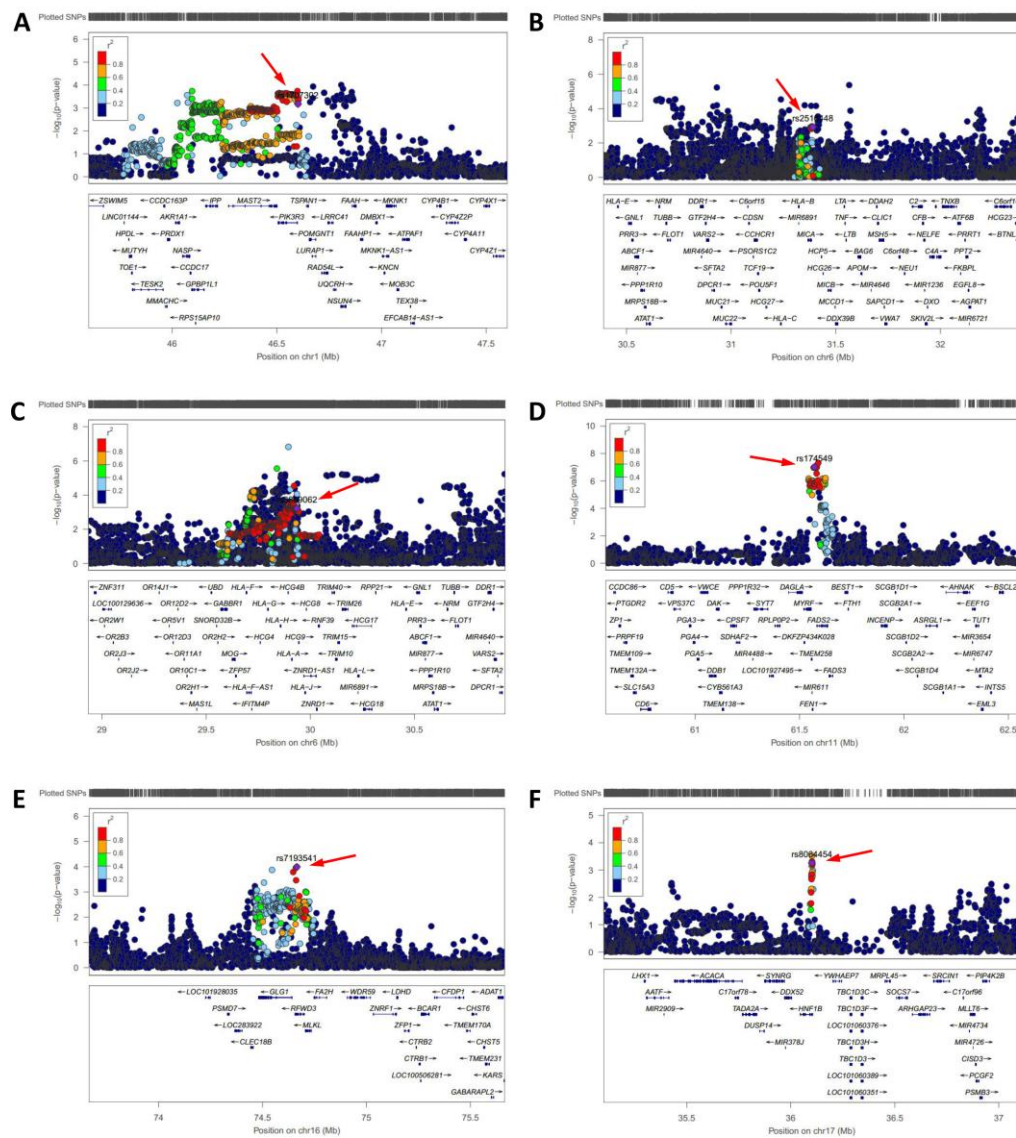

**Supplementary Figure 1. The regional plot of 6 significant SNPs.** (A) The regional plot of rs1707302. (B) The regional plot of rs2516448. (C) The regional plot of rs3869062. (D) The regional plot of rs174549. (E) The regional plot of rs7193541. (F) The regional plot of rs8064454.

**A** rs1707302 MAST2 Lung ( $\beta=0.16$ ,  $P=4.30E-07$ )

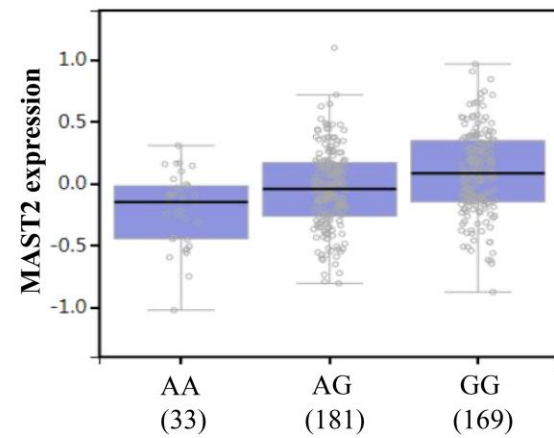

**B** rs3869062 HLA-G Lung ( $\beta=0.77$ ,  $P=9.60E-08$ )

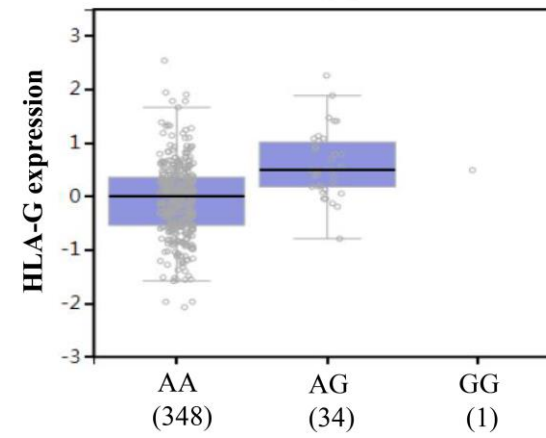

**C** rs8064454 HNF1B Lung ( $\beta=0.065$ ,  $P=0.028$ )

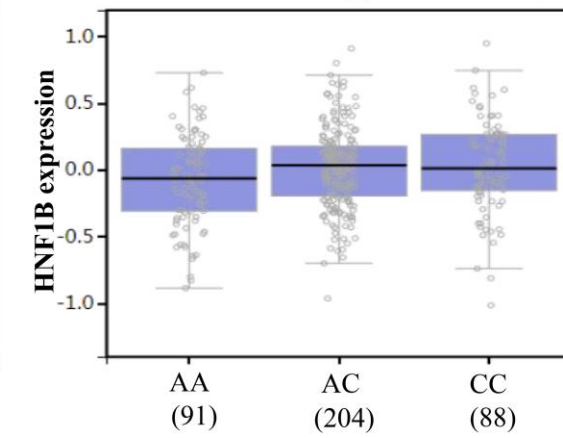

**D** rs2516448 MICA Lung ( $\beta=-0.34$ ,  $P=1.50E-14$ )

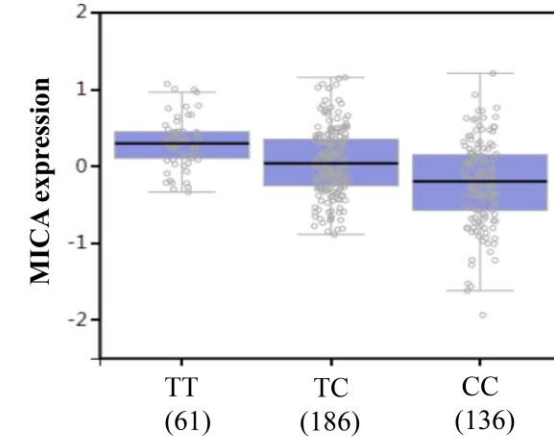

**E** rs7193541 RFWD3 Lung ( $\beta=-0.23$ ,  $P=2.20E-07$ )

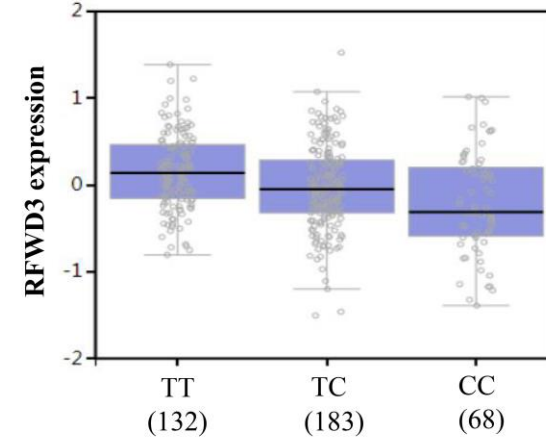

**F** rs174549 FADS1 Liver ( $\beta=-0.40$ ,  $P=4.20E-04$ )

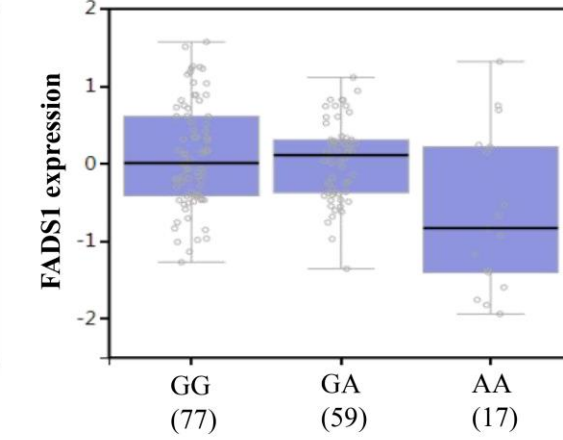

**Supplementary Figure 2. Box plot displaying the association of SNPs with gene expression based on GTEx dataset v7 release.** (A) The association between rs1707302 genotypes and MAST2 expression in lung tissues. (B) The association between rs3869062 genotypes and HLA-G expression in lung tissues. (C) The association between rs8064454 genotypes and HNF1B expression in lung tissues. (D) The association between rs2516448 genotypes and MICA expression in lung tissues. (E) The association between rs7193541 genotypes and RFWD3 expression in lung tissues. (F) The association between rs174549 genotypes and FADS1 expression in liver tissues.
